# Supplementary material for: Open-source real-time quantitative RT-PCR-based on a RNA standard for the assessment of SARS-CoV-2 viral load
Source: PubMed Central journal article supplement (PMC8803346; doi:10.1590/0074-02760210237), 2022-01-28
Supplement: 1678-8060-mioc-116-e210237-s.pdf [file 1678-8060-mioc-116-e210237-s.pdf]

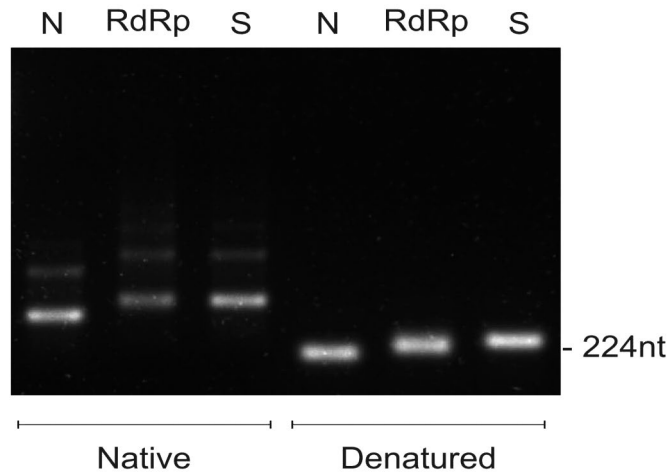

Fig. 1: purity of the RNA templates used in the optimization of the real time quantitative reverse transcription PCR (RT-qPCR) assay. Transcripts from the nucleoprotein (N), RNA-dependent RNA polymerase (RdRp) and spike glycoprotein (S) target sequences from severe acute respiratory syndrome coronavirus 2 (SARS-CoV-2) were denatured by heating, followed by cooling and migrated in agarose gel electrophoresis. The native samples, without a denaturation protocol, of each RNA were migrated in parallel to compare the pattern of migration. The denatured N, RdRp and S transcripts have 196 nt, 224 nt and 244 nt, respectively.

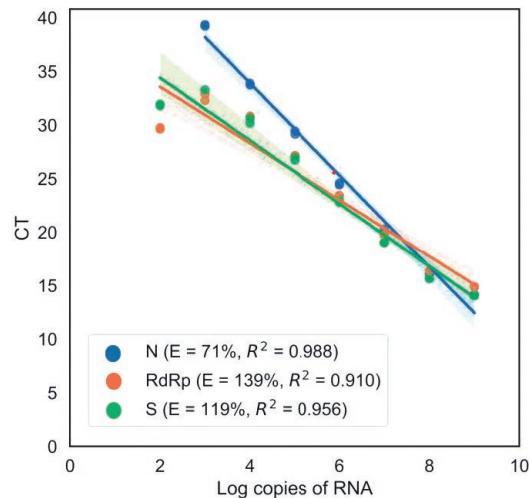

Fig. 2: standard quantification curves of the nucleoprotein (N), RNA-dependent RNA polymerase (RdRp) and spike glycoprotein (S) genes. Linear regression analysis of 10 serial dilutions using the RNA transcripts of the N, RdRp and S genes from a nasopharyngeal swab sample. Ct: cycle threshold. Gene N (Slope: -4.292, intercept: 51.074,  $R^2$ : 0.988 and p-value:  $6.3E^{-13}$ ); Gene Orflab (Slope: -2.641, intercept: 38.859,  $R^2$ : 0.910, and p-value:  $1.041E^{-08}$ ); Gene S (Slope: -2.934, intercept: 40.289,  $R^2$ : 0.956 and p-value:  $3.207E^{-10}$ ).

TABLE I

Characteristics and results of the biological samples included in the test of sensitivity and specificity of the RNA-dependent RNA polymerase (RdRp) real-time quantitative polymerase chain reaction (RT-qPCR) assay

| ID  | Days after symptoms onset | Type of sample      | RT-qPCR (in house) | Allplex             |                        |                     | Classification |
|-----|---------------------------|---------------------|--------------------|---------------------|------------------------|---------------------|----------------|
|     |                           |                     | RdRP gene CT       | E gene CT (Allplex) | RdRP gene CT (Allplex) | N gene CT (Allplex) |                |
| 176 | 5                         | nasopharyngeal swab | 29,82              | 25,99               | 29,24                  | 29,03               | TP             |
| 176 | 5                         | oropharyngeal swab  | Undetermined       | 33,97               | 37,74                  | 36,51               | FN             |
| 179 | 5                         | nasopharyngeal swab | 20,17              | 15,12               | 19,14                  | 18,76               | TP             |
| 179 | 5                         | oropharyngeal swab  | 25,67              | 22,12               | 25,64                  | 25,84               | TP             |
| 183 | 4                         | nasopharyngeal swab | 31,93              | 27,52               | 30,19                  | 29,85               | TP             |
| 183 | 4                         | oropharyngeal swab  | 30,56              | 26,79               | 31,09                  | 30,6                | TP             |
| 239 | 10                        | nasopharyngeal swab | 35,73              | 31,01               | 34,73                  | 32,71               | TP             |
| 239 | 10                        | oropharyngeal swab  | 34,38              | 29,97               | 33,44                  | 33,99               | TP             |
| 285 | 13                        | nasopharyngeal swab | 36,10              | 30,12               | 32,64                  | 33,17               | TP             |
| 285 | 13                        | oropharyngeal swab  | 32,79              | 29,25               | 33,12                  | 33,22               | TP             |
| 297 | 7                         | nasopharyngeal swab | 31,38              | 26,94               | 30,14                  | NA                  | TP             |
| 297 | 7                         | oropharyngeal swab  | 31,92              | 28,02               | 32,52                  | NA                  | TP             |
| 300 | 9                         | nasopharyngeal swab | 31,41              | 27,31               | 31,07                  | 30,3                | TP             |
| 300 | 9                         | oropharyngeal swab  | 35,00              | 30,86               | 34,87                  | 34,54               | TP             |
| 302 | 10                        | nasopharyngeal swab | 15,99              | 11,32               | 13,67                  | 13,39               | TP             |
| 302 | 10                        | oropharyngeal swab  | 33,18              | 29,63               | 32,84                  | 32,19               | TP             |
| 303 | 9                         | nasopharyngeal swab | 28,56              | 23,33               | 26,54                  | 26,81               | TP             |
| 303 | 9                         | oropharyngeal swab  | 30,52              | 26,85               | 30,53                  | 30,24               | TP             |
| 304 | 6                         | nasopharyngeal swab | 21,45              | 15,05               | 17,77                  | 17,3                | TP             |
| 304 | 6                         | oropharyngeal swab  | 27,94              | 24,17               | 28,05                  | 27,82               | TP             |
| 305 | 6                         | nasopharyngeal swab | 38,02              | 33,11               | 34,71                  | 34,51               | TP             |
| 305 | 6                         | oropharyngeal swab  | 34,96              | 30,46               | 33,22                  | 33,29               | TP             |
| 306 | 3                         | nasopharyngeal swab | 34,96              | 30,06               | 32,78                  | 32,38               | TP             |
| 306 | 3                         | oropharyngeal swab  | 31,92              | 27,86               | 31,6                   | 32                  | TP             |
| 307 | 9                         | nasopharyngeal swab | 32,43              | 27,57               | 30,1                   | 29,86               | TP             |
| 307 | 9                         | oropharyngeal swab  | 35,17              | 31,76               | 34,15                  | 35,23               | TP             |
| 308 | 6                         | nasopharyngeal swab | 35,55              | 29,22               | 32,34                  | 31,6                | TP             |
| 308 | 6                         | oropharyngeal swab  | 37,76              | 33,43               | 38,28                  | 37,52               | TP             |
| 309 | 8                         | nasopharyngeal swab | 23,70              | 18,87               | 20,85                  | 21,47               | TP             |
| 309 | 8                         | oropharyngeal swab  | 32,32              | 28,48               | 32,08                  | 32,46               | TP             |
| 310 | 10                        | nasopharyngeal swab | 26,35              | 21,63               | 24,06                  | 25,16               | TP             |
| 310 | 10                        | oropharyngeal swab  | 32,13              | 27,92               | 31,24                  | 31,76               | TP             |
| 311 | 11                        | nasopharyngeal swab | 36,54              | 32,69               | 34,87                  | 35,4                | TP             |
| 311 | 11                        | oropharyngeal swab  | 25,78              | 19,17               | 22,31                  | 21,89               | TP             |
| 312 | 11                        | nasopharyngeal swab | 33,62              | 29,97               | 33,21                  | 33,21               | TP             |
| 312 | 11                        | oropharyngeal swab  | 32,24              | 25,8                | 29,33                  | 29,01               | TP             |
| 313 | 10                        | nasopharyngeal swab | 35,20              | 31,46               | 35,36                  | 35,04               | TP             |
| 313 | 10                        | oropharyngeal swab  | 26,08              | 20,23               | 24,04                  | 23,6                | TP             |
| 314 | 4                         | nasopharyngeal swab | Undetermined       | NA                  | NA                     | NA                  | TN             |
| 314 | 4                         | oropharyngeal swab  | Undetermined       | NA                  | NA                     | NA                  | TN             |
| 315 | 13                        | nasopharyngeal swab | 29,14              | 24,36               | 27,04                  | 27,2                | TP             |
| 315 | 13                        | oropharyngeal swab  | 29,46              | 25,01               | 28,08                  | 28,32               | TP             |
| 316 | 3                         | nasopharyngeal swab | 28,21              | 22,71               | 25,53                  | 25,5                | TP             |
| 316 | 3                         | oropharyngeal swab  | 27,83              | 24,23               | 28,2                   | 28,36               | TP             |
| 317 | 8                         | nasopharyngeal swab | 24,10              | 20,54               | 23,02                  | 23,46               | TP             |

|       |    |                     |              |       |       |       |    |
|-------|----|---------------------|--------------|-------|-------|-------|----|
| 317   | 8  | oropharyngeal swab  | 27,41        | 23,94 | 27,82 | 28,6  | TP |
| 318   | 9  | nasopharyngeal swab | 28,73        | 22,04 | 25,24 | 25,38 | TP |
| 318   | 9  | oropharyngeal swab  | 29,90        | 25,6  | 29,18 | 29,19 | TP |
| 319   | 3  | nasopharyngeal swab | 17,20        | 9,28  | 11,98 | 12,32 | TP |
| 320   | 17 | nasopharyngeal swab | 30,49        | 26,14 | 28,27 | 28,4  | TP |
| 320   | 17 | oropharyngeal swab  | 34,14        | 30,4  | 33,95 | 33,18 | TP |
| 321   | 6  | nasopharyngeal swab | 24,83        | 19,93 | 24,1  | 23,5  | TP |
| 321   | 6  | oropharyngeal swab  | 23,77        | 19,43 | 23,1  | 22,76 | TP |
| 322   | 11 | nasopharyngeal swab | 31,92        | 27,35 | 29,62 | 28,75 | TP |
| 322   | 11 | oropharyngeal swab  | 33,52        | 29,6  | 33,81 | 33,73 | TP |
| 324   | 18 | nasopharyngeal swab | 33,96        | 29,36 | 32,28 | 31,83 | TP |
| 324   | 18 | oropharyngeal swab  | Undetermined | NA    | NA    | NA    | TN |
| 325   | 8  | nasopharyngeal swab | 22,15        | 17,59 | 20,57 | 19,81 | TP |
| 325   | 8  | oropharyngeal swab  | 36,29        | 31,66 | 35,52 | 35,64 | TP |
| 326   | 10 | nasopharyngeal swab | 32,22        | 26,11 | 29,74 | 29,57 | TP |
| 326   | 10 | oropharyngeal swab  | 31,99        | 28,76 | 32,11 | 32,02 | TP |
| 327   | 10 | nasopharyngeal swab | 33,68        | 28,94 | 32,07 | 31,52 | TP |
| 327   | 10 | oropharyngeal swab  | Undetermined | NA    | NA    | 39,56 | FN |
| 328   | 13 | nasopharyngeal swab | Undetermined | 34,26 | 36,51 | 35,45 | FN |
| 328   | 13 | oropharyngeal swab  | Undetermined | 34,83 | NA    | 39,02 | FN |
| 329   | 10 | nasopharyngeal swab | Undetermined | 30,95 | 36,01 | 33,75 | FN |
| 329   | 10 | oropharyngeal swab  | 34,45        | 30,37 | 33,09 | 34,05 | TP |
| 330   | 12 | nasopharyngeal swab | 24,54        | 19,4  | 22,96 | 23,11 | TP |
| 330   | 12 | oropharyngeal swab  | 34,18        | 30,16 | 34,18 | 33,66 | TP |
| 331   | 12 | nasopharyngeal swab | 36,49        | 31,77 | 36,63 | 35,56 | TP |
| 331   | 12 | oropharyngeal swab  | 32,92        | 29,03 | 32,63 | 32,95 | TP |
| 333   | 11 | nasopharyngeal swab | 31,19        | 26,78 | 29,89 | 29,35 | TP |
| 333   | 11 | oropharyngeal swab  | 36,29        | 32,91 | 36,57 | 36,07 | TP |
| 334   | 6  | nasopharyngeal swab | 24,49        | 18,85 | 21,34 | 21,4  | TP |
| 334   | 6  | oropharyngeal swab  | 26,17        | 22,17 | 25,39 | 25,71 | TP |
| 335   | 12 | nasopharyngeal swab | 23,22        | 19,56 | 22,7  | 22,66 | TP |
| 335   | 12 | oropharyngeal swab  | 27,25        | 23,98 | 27,33 | 27,59 | TP |
| 337   | 13 | nasopharyngeal swab | 35,70        | 28,76 | 33,1  | 32,03 | TP |
| 337   | 13 | oropharyngeal swab  | Undetermined | 34,55 | 36,98 | 38,93 | FN |
| 338   | 7  | nasopharyngeal swab | 23,98        | 18,84 | 22,92 | 21,49 | TP |
| 343   | 12 | oropharyngeal swab  | Undetermined | NA    | NA    | NA    | TN |
| 554   | 1  | nasopharyngeal swab | 38,82        | 30,81 | 37,11 | 33,04 | TP |
| 599   | 2  | nasopharyngeal swab | 16,87        | 11,53 | 15,05 | 14,61 | TP |
| 721   | 4  | oropharyngeal swab  | Undetermined | 35,51 | NA    | 37,07 | FN |
| 14625 | 6  | nasopharyngeal swab | Undetermined | 34,86 | NA    | 35,37 | FN |
| 14701 | 5  | oropharyngeal swab  | 15,74        | 10,97 | 15,58 | 14,14 | TP |

TABLE II  
Number of viral copies per reaction (quantity) and the corresponding cycle threshold (Ct) for each replicate used in the assay

| Quantity | Ct    |
|----------|-------|
| 100      | 35,20 |
| 100      | 31,30 |
| 100      | 33,57 |
| 100      | 32,24 |
| 100      | 32,41 |
| 100      | 35,76 |
| 100      | 33,86 |
| 100      | 38,58 |
| 100      | 34,65 |
| 100      | 34,28 |
| 1000     | 31,83 |
| 1000     | 30,57 |
| 1000     | 33,01 |
| 1000     | 32,37 |
| 1000     | 32,10 |
| 1000     | 30,93 |
| 1000     | 30,77 |
| 1000     | 33,06 |
| 1000     | 35,59 |
| 1000     | 32,26 |
| 10000    | 28,67 |
| 10000    | 28,36 |
| 10000    | 30,02 |
| 10000    | 29,32 |
| 10000    | 29,27 |
| 10000    | 27,96 |
| 10000    | 27,92 |
| 10000    | 29,48 |
| 10000    | 30,43 |
| 10000    | 28,08 |
| 10000    | 29,56 |
| 100000   | 25,19 |
| 100000   | 25,06 |
| 100000   | 26,65 |
| 100000   | 25,91 |
| 100000   | 26,06 |
| 100000   | 24,81 |
| 100000   | 24,78 |
| 100000   | 25,75 |
| 100000   | 25,96 |
| 100000   | 24,89 |
| 100000   | 26,10 |
| 1000000  | 21,89 |

|            |       |
|------------|-------|
| 1000000    | 21,93 |
| 1000000    | 23,38 |
| 1000000    | 23,16 |
| 1000000    | 22,76 |
| 1000000    | 21,48 |
| 1000000    | 21,44 |
| 1000000    | 22,27 |
| 1000000    | 22,49 |
| 1000000    | 23,07 |
| 1000000    | 22,86 |
| 10000000   | 18,49 |
| 10000000   | 18,48 |
| 10000000   | 20,02 |
| 10000000   | 19,12 |
| 10000000   | 19,35 |
| 10000000   | 18,23 |
| 10000000   | 18,17 |
| 10000000   | 18,80 |
| 10000000   | 19,03 |
| 10000000   | 19,24 |
| 10000000   | 19,35 |
| 100000000  | 15,19 |
| 100000000  | 15,14 |
| 100000000  | 16,63 |
| 100000000  | 15,58 |
| 100000000  | 16,09 |
| 100000000  | 14,91 |
| 100000000  | 14,29 |
| 100000000  | 15,07 |
| 100000000  | 15,35 |
| 100000000  | 15,73 |
| 100000000  | 16,00 |
| 1000000000 | 12,03 |
| 1000000000 | 11,72 |
| 1000000000 | 13,28 |
| 1000000000 | 11,13 |
| 1000000000 | 12,88 |
| 1000000000 | 11,50 |
| 1000000000 | 11,47 |
| 1000000000 | 11,73 |
| 1000000000 | 11,87 |
| 1000000000 | 12,55 |
| 1000000000 | 12,82 |
